1 **Using confidence inferred from pupil-size to dissect perceptual**  
2 **task-strategy: support for a bounded decision-formation process**

3

4

5 Katsuhisa Kawaguchi<sup>1,2</sup>, Stephane Clery<sup>2</sup>, Paria Pourriahi<sup>2</sup>, Lenka Seillier<sup>2</sup>, Ralf Haefner<sup>3</sup>, Hendrikje  
6 Nienborg<sup>2,\*</sup>

7

8

9 <sup>1</sup>, Graduate School of Neural and Behavioural Sciences, International Max Planck Research School,  
10 72074 Tuebingen, Germany

11 <sup>2</sup>, University of Tuebingen, Werner Reichardt Centre for Integrative Neuroscience, 72076 Tuebingen,  
12 Germany

13 <sup>3</sup>, Brain & Cognitive Sciences, University of Rochester, Rochester, NY 14627, USA

14

15

16

17 \*correspondence should be addressed to: [hendrikje.nienborg@cin.uni-tuebingen.de](mailto:hendrikje.nienborg@cin.uni-tuebingen.de)

18

19

20

21 **During perceptual decisions subjects often rely more strongly on early rather than late**  
22 **sensory evidence even in tasks when both are equally informative about the correct**  
23 **decision. This early psychophysical weighting has been explained by an integration-to-**  
24 **bound decision process, in which the stimulus is ignored after the accumulated evidence**  
25 **reaches a certain bound, or confidence level. Here, we derive predictions about how the**  
26 **average temporal weighting of the evidence depends on a subject's decision-confidence**  
27 **in this model. To test these predictions empirically, we devised a method to infer**  
28 **decision-confidence from pupil size in monkeys performing a disparity discrimination**  
29 **task. Our animals' data confirmed the integration-to-bound predictions, with different**  
30 **internal decision-bounds accounting for differences between animals. However, the data**  
31 **could not be explained by two alternative accounts for early psychophysical weighting:**  
32 **attractor dynamics either within the decision area or due to feedback to sensory areas, or**  
33 **a feedforward account due to neuronal response adaptation. This approach also opens**  
34 **the door to using confidence more broadly when studying the neural basis of decision-**  
35 **making.**

36

37

## 38 Introduction

39 During perceptual discrimination tasks subjects often rely more strongly on early rather than late  
40 sensory evidence even when both are equally informative about the correct decision e.g. <sup>1-4</sup>.  
41 (But note that some studies in rodents and humans reported uniform weighting of the stimulus  
42 throughout the trial <sup>5-7</sup>). From the perspective of maximizing the sensory information and hence  
43 performance such early weighting is non-optimal. Understanding this behavior may shed light  
44 on how the activity, or the read-out of sensory neurons limits our perceptual abilities, a major  
45 goal of contemporary neuroscience (e.g. <sup>8-10</sup>). The classical explanation for such early  
46 psychophysical weighting is that it reflects an integration-to-bound decision-process in which  
47 sensory evidence is ignored once an internal decision-bound is reached <sup>1</sup>. For simple  
48 perceptual discrimination tasks, decision confidence can be defined statistically <sup>11</sup>, and hence  
49 also measured for such a model. Here, we derived new predictions of this model for how the  
50 temporal weighting of sensory evidence should vary as a function of decision confidence on  
51 individual trials. These revealed characteristic differences in the temporal weighting for high and  
52 low confidence trials, depending on the decision bound. We then sought to test these  
53 predictions in macaques performing a fixed duration visual discrimination task while also  
54 measuring the animal's subjective decision confidence.

55  
56 Measuring decision confidence psychophysically is relatively difficult, particularly in animals, and  
57 increases the complexity of a task, as e.g. for post-decision wagering <sup>12,13</sup>, hence requiring  
58 additional training. To avoid these difficulties we devised a metric based on the monkeys' pupil  
59 size. Combining this metric for decision confidence with psychophysical reverse correlation <sup>3,14,15</sup>  
60 allowed us to quantify the animals' psychophysical weighting strategy for different levels of  
61 inferred decision-confidence, and test our model predictions. The animals showed clear early  
62 psychophysical weighting on average. But separating this analysis by inferred decision  
63 confidence revealed that early psychophysical weighting was largely restricted to high  
64 confidence trials. In fact, on low inferred confidence trials the animals weighted the stimulus  
65 relatively uniformly or even slightly more towards the end of the trial. Such behavior matched  
66 the predictions of the integration-to-bound model. Furthermore, the differences between both  
67 animals could be accounted for by the model by differences in the only free parameter – their  
68 internal decision-bound.

69  
70 In contrast, the animals' behavior could not be fully explained by two alternative accounts of  
71 early psychophysical weighting. The first alternative account are models in which the decision-

72 stage provides self-reinforcing feedback to the sensory neurons <sup>16</sup>, as suggested, e.g. for  
73 probabilistic inference <sup>17</sup>, or by attractor dynamics within the decision-making area <sup>28</sup>. The  
74 second, recent alternative proposal is that the early weighting simply reflects the feed-forward  
75 effect of the dynamics (gain control or adaptation) of the activity of the sensory neurons <sup>4</sup>.  
76 Although each of these alternatives predicts the early weighting, we were unable to fully capture  
77 the animals' data with the temporal weighting predictions of these models when separating trials  
78 by decision-confidence.

79  
80 Together, our data suggest that the animals rely on a bounded decision-formation process. In  
81 this model, evidence at the end of the trial is only ignored once a certain level of decision-  
82 confidence is reached, thereby reducing the impact on performance. Moreover, this combination  
83 of techniques provides a novel tool for a more fine-grained dissection of an animal's  
84 psychophysical behavior.

85  
86 **Results**  
87 *Integration-to-bound models predict characteristic differences in temporal sensory weighting*  
88 *when separating trials by decision-confidence*

89 Subjects during psychophysical discrimination task often give more weight to the early than late  
90 part of the stimulus presentation even in tasks when both are equally informative about the  
91 correct answer <sup>1,3,4</sup>. We refer to this behavior as early psychophysical weighting, and the  
92 standard computational account is that it reflects an integration-to-bound decision process <sup>1</sup>. In  
93 brief, this explanation suggests that subjects accumulate sensory evidence only up to a  
94 predefined bound not only in reaction time tasks but also in tasks when the stimulus duration is  
95 fixed by the experimenter, and when a complete accumulation of evidence over the course of  
96 the entire trial would be optimal. As a result, sensory evidence after the internal bound is  
97 reached is ignored and, together with a variable time at which this bound is reached, *on average*,  
98 early evidence is weighted more strongly than evidence presented late in the trial. If this  
99 explanation for the observed early weighting is correct, then across trials in which the decision-  
100 variable never reaches the bound, all evidence would be weighted equally, regardless when it  
101 was presented during the trial.

102  
103 Interestingly, for simple perceptual discriminations tasks, decision confidence can be defined  
104 statistically <sup>11</sup>, and directly linked to the decision-variable. In an integration-to-bound model it  
105 simply reflects the distance of the decision-variable to the category boundary. Here, we

106 exploited this link and systematically explored how the temporal weighting of the sensory  
107 stimulus should depend on decision-confidence according to the integration-to-bound model. To  
108 do so we categorized trials into high or low confidence trials (median split) and measured the  
109 temporal weighting of the sensory evidence as the amplitude of the psychophysical kernel  
110 (PKA) over time (see Methods) for each category. We compared these for high confidence trials,  
111 low confidence trials and across all trials while systematically varying the decision bound of the  
112 model (Fig. 1). As expected we found that the average PKA decreases more steeply if the  
113 decision bound is lower (see black lines in Fig. 1a through 1e), indicating that the decision-  
114 bound was reached earlier on average, and therefore the sensory evidence ignored from an  
115 earlier point in the trial. It is also intuitive that the PKA was typically larger for high compared to  
116 low confidence trials reflecting the stronger sensory evidence, and hence confidence, on those  
117 trials. Note that if the decision-bound is low, the decision-bound is reached on a large proportion  
118 of trials, and the assigned decision-confidence identical. These trials are therefore randomly  
119 assigned to the high and low confidence category, resulting in the similarity of the PKAs (Fig.  
120 1a). However, an interesting, non-trivial characteristic emerges for intermediate values of the  
121 decision bound (Fig. 1b-c). Relatively strong evidence early during the trial led to high-  
122 confidence and early reaching of the decision boundary, resulting in the pronounced decrease  
123 of the PKA for high confidence trials. But for low confidence trials, the PKA not only showed no  
124 decrease but an increase over time (Fig. 1b-d). As a result the PKAs for high and low  
125 confidence trials crossed and the PKA for low confidence trials exceeded that for high  
126 confidence trials at the end of the stimulus presentation. Over a range of values of the decision-  
127 bound the difference between the PKA for high and low confidence trials was therefore negative  
128 (Fig. 1f). This characteristic behavior was even more pronounced when we defined decision-  
129 confidence not only based on evidence but also decision time, as previously suggested<sup>12,18</sup> (cf.  
130 Fig. 1g-l). (Since our analysis depended only on the rank-order of the decision confidence these  
131 results hold generally, regardless of the relative weighting of time and evidence for decision  
132 confidence, see Methods.) Note that after sorting zero-signal trials by decision-variable, the PKA  
133 cannot easily be interpreted as a weight on the stimulus. For instance, the temporal weights on  
134 any one trial are always a non-zero constant starting at the beginning of the trial, and zero after  
135 some point. As a result, the averaged weights across all trials must be decreasing. The fact that  
136 the PKA may be increasing is the result of sorting the trials by confidence which separates the  
137 stimulus distributions between the high and the low signal trials. Equally, the more pronounced  
138 early difference in PKAs for low decision bounds (cf. Fig. 1a and 1g) reflects the fact that when  
139 decision-confidence is based on both time and evidence, trials with stronger early sensory

140 evidence, and hence early decision-times, are assigned to the high confidence category.  
 141 Nonetheless, these simulations reveal characteristic predictions about how a particular statistic  
 142 – the psychophysical kernel as measured by taking the difference between the choice-triggered  
 143 averages – should vary as a function of confidence for a bounded decision-formation process.  
 144 We therefore next aimed to test these predictions in monkeys performing a visual discrimination  
 145 task for which early psychophysical weighting was previously reported<sup>3</sup>.  
 146

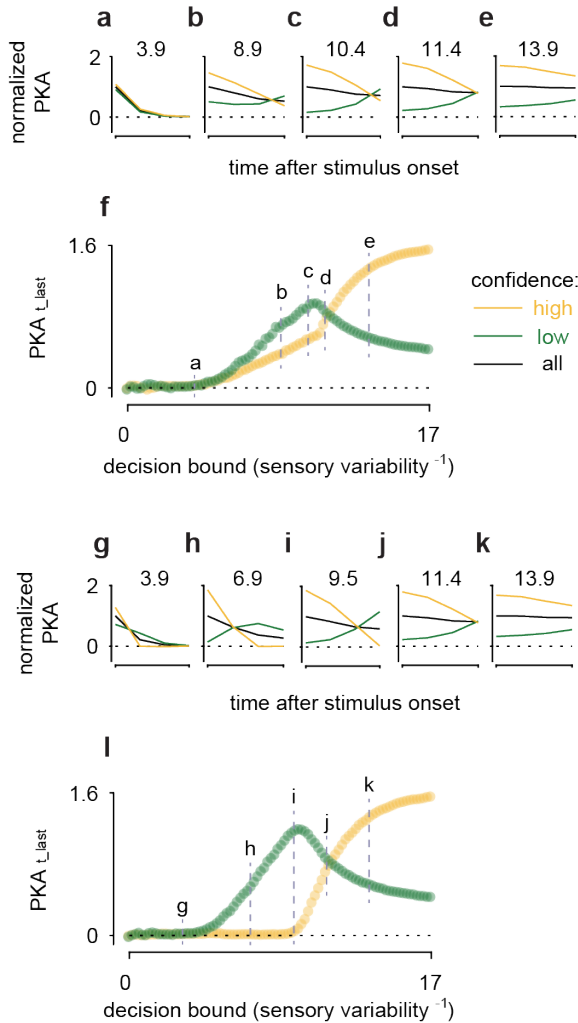

**Figure 1. Integration-to-bound models predict characteristic differences in temporal sensory weighting for high and low confidence trials. a-e)** The amplitude of the psychophysical kernel (PKA) is plotted over time for integration-to-bound models with different decision bounds. PKAs for low confidence, high confidence and averaged across all trials are shown in green, yellow and black, respectively, and normalized by the peak of the average psychophysical kernel. Note that for intermediate levels of the decision-bound the PKAs cross such that the PKA for low confidence trials exceeds that for high confidence trials at the end of the stimulus presentation. The value of the decision bound is marked in each panel. **f)** PKA<sub>t<sub>last</sub></sub> is plotted for high (yellow) and low (green) confidence trials. The difference,  $\Delta PKA_{t_{last}}$ , depends characteristically on the level of the decision-bound in the model and the stimulus strength. Note that the decision-bound is normalized by the standard deviation of the sensory variability. The relationship between  $\Delta PKA_{t_{last}}$  and the value of the decision bound therefore holds generally across tasks with different stimulus variability. **g-l)** Same as a-f) but for in an integration-to-bound model in which decision-confidence is based on both decision-time and evidence. Note that since our analysis only relied on the rank-order of the decision-confidence the results are independent of the relative weight of these influences on decision-confidence.

147  
 148  
 149 *The animals exhibit early psychophysical weighting behavior in this task*  
 150 Two macaque monkeys performed a coarse disparity discrimination task (Fig. 2a), similar to that  
 151 described previously<sup>3</sup>. The animals initiated each trial by fixating on a small fixation marker, and  
 152 after a delay of 500ms a dynamic random dot stimulus was presented for a fixed duration of  
 153 1500ms. The stimulus was a circular random dot pattern defining a central disk and a

154 surrounding annulus. The animals' task was to determine whether the disparity-varying center  
155 was either protruding ("near") or receding ("far") relative to the surrounding annulus. Following  
156 the stimulus presentations two choice targets appeared above and below the fixation point, one  
157 symbolizing a "near" choice, the other a "far" choice. Importantly, the positions of the choice  
158 targets were randomized between trials such that the animals' choices were independent of  
159 their saccade direction. While the animals performed this task we measured their eye positions  
160 and pupil size.

161  
162 Similar to previous findings, e.g. <sup>1,3,4</sup> the animals relied more strongly on the stimulus early than  
163 late during the stimulus presentation. We quantified this as a decrease in the PKA (see  
164 Methods) throughout the stimulus presentation (Fig. 2b). In order to test the model predictions  
165 separated by decision-confidence in the animals' data we therefore sought to devise an  
166 approach to infer the animals' decision confidence from pupil size measurements in this task.

167

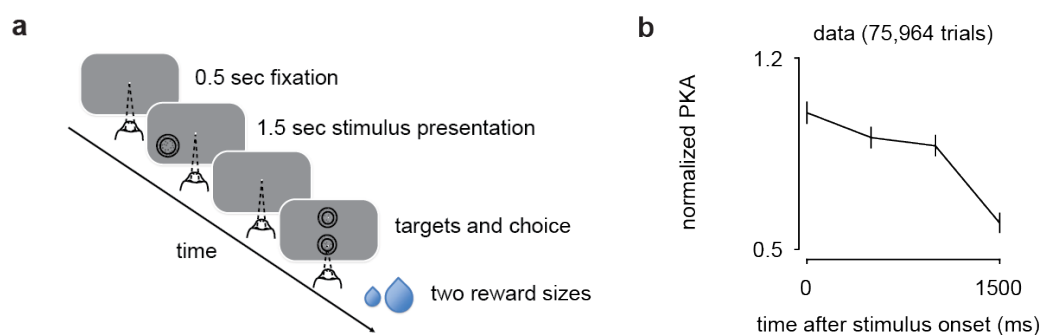

168  
169 **Figure 2. Task and early psychophysical weighting behavior.** a) Two choice disparity discrimination  
170 task. After the animals maintained fixation for 0.5 sec the stimulus was shown for 1.5 sec. The animals  
171 had to decide whether the stimulus was 'far' or 'near' by making a saccade to one of two targets after the  
172 stimulus offset and received a liquid reward for correct choices. b) The time-course of the psychophysical  
173 kernel amplitude (normalized) shows that the animals weight the stimulus more strongly early during the  
174 trial. Data were obtained from 0% signal small available reward trials and collapsed across animals (A:  
175 36,222 trials in 213 sessions, B: 13,334 trials in 84 sessions). Error bars are SEM derived by resampling.

176  
177 *Pupil size is systematically associated with experimental covariates, consistent with pupil-linked*  
178 *changes in arousal*

179 Pupil size has been linked to a subjects' arousal in both humans <sup>19</sup> and monkeys <sup>20-23</sup>. Our  
180 animals performed a substantial number of trials in each session (mean; animal A: 828, animal  
181 B: 1067). We therefore wondered whether a signature of their decreasing motivation with  
182 increased satiation during the behavioral session could be found in the animals' pupil sizes. To  
183 this end we split the trials of each session into five equally sized bins (quintiles) and computed

184 the average pupil size aligned on stimulus onset (Fig. **3a**). For these averages only 0% signal  
185 trials on which the available reward size was small (see Methods) were used. Moreover, to  
186 allow for the detection of slow trends throughout the session the pupil size data were not high-  
187 pass filtered for this analysis. We found that in both animals pupil size systematically decreased  
188 throughout the session, as expected for a decrease in arousal with decreased motivation or task  
189 engagement with progressive satiation.

190  
191 We next explored the effect of varying the available reward size in a predictable way (see  
192 Methods). Consistent with previous results<sup>24</sup> the animals' psychophysical performance on large  
193 available reward trials exceeded that on small available reward trials (Fig. **3d**). When averaging  
194 the time-course of the pupil size for 0% signal trials separated by available reward size, we  
195 found that pupil size for large available reward trials increased progressively compared to that  
196 on small available reward trials (Fig. **3b**). The animals were rewarded after correct choices  
197 following the stimulus presentation. The time-course of this pupil-size modulation with available  
198 reward size is therefore consistent with modulation related to the animals' expectation of the  
199 reward towards the end of the trial. Indeed, the difference in mean pupil with available reward  
200 size over the last 250ms of the stimulus presentation was highly statistically reliable (Fig. **3e**),  
201 similar to previous findings<sup>25</sup>.

202  
203 Note that previous studies that revealed arousal linked pupil size modulation typically used long  
204 inter-trial-intervals lasting several seconds<sup>20-23</sup>, which were deemed necessary to stabilize pupil  
205 size prior to stimulus or trial onset. Conversely, our task allowed for short inter-trial-intervals  
206 (animal A: 65-4772ms, median: 136ms; animal B: 115-3933, median: 146ms) to yield a large  
207 number of trials per session. Nonetheless, the above analyses revealed robust signatures of  
208 pupil size modulation with experimental manipulations of arousal also for this task.

209  
210 Previous work in humans found that pupil size increased with task difficulty, which is thought to  
211 reflect changes in arousal related to "cognitive load" or "mental effort"<sup>26-28</sup>. To explore whether  
212 such a signature was evident for our task, we divided our data into easy ( $\geq 50\%$  signal) and hard  
213 trials ( $\leq 10\%$  signal, excluding 0% signal trials) (Fig. **3c**). To remove effects of available reward  
214 size this analysis was restricted to small available reward trials. Consistent with the expected  
215 modulation for cognitive load, pupil size in hard trials weakly exceeded that for easy trials in the  
216 initial period of the stimulus presentation (before  $\sim 750$ ms after stimulus onset). However, the

217 more pronounced modulation with task difficulty occurred in the opposite direction towards the  
 218 end of the trial.  
 219

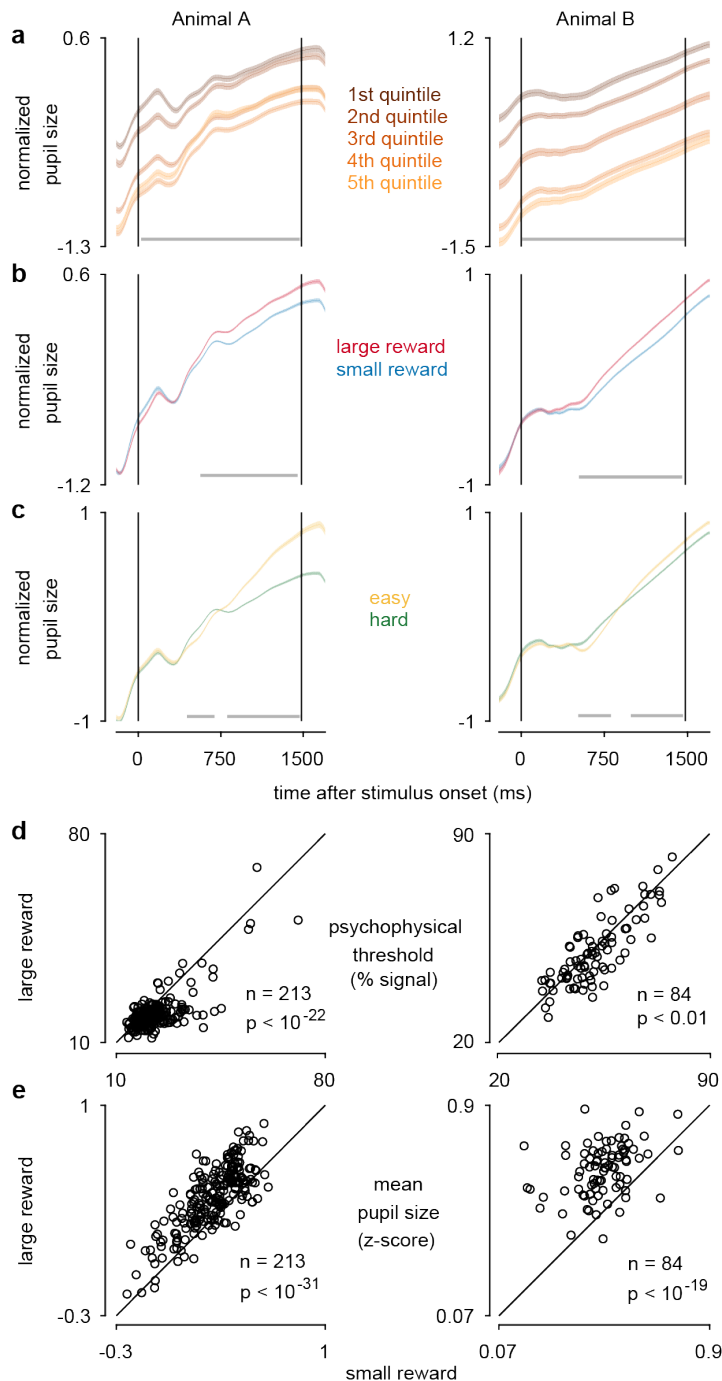

**Figure 3. Pupil size modulation with task covariates is consistent with pupil-linked arousal. a-c**

average z-scores (across conditions)  $\pm$  SEM of pupil size aligned on stimulus onset are shown for monkey A (left) and B (right). Horizontal lines at the bottom of each panel depict epochs of significant ( $p < 0.05$ , corrected for multiple comparisons) pupil size modulation (by ANOVA in **a**), two sample t-tests in **b-c**). **a**) Mean pupil size for five equally sized bins throughout each experimental session. Only small available reward 0% signal trials are used. Pupil size decreases throughout the session as expected for decreasing motivation. (A: 6,987 trials from 213 sessions, B: 2,571 trials from 84 sessions). **b**) Average time courses of pupil size on 0% signal trials for large (red) and small (blue) available reward trials. (A: 18,855 small available reward trials and 18,678 large available reward trials from 213 sessions, B: 6,843 small available reward trials and 6,832 large available reward trials from 84 sessions) **c**) Average time courses of pupil size on hard (<10%, excluding 0% signal, green) and easy ( $\geq 50\%$  signal, yellow) trials. Only trials with the small available reward were used. (A: 39,390 hard trials and 8,651 easy trials from 213 sessions, B: 10,813 hard trials and 14,020 easy trials from 84 sessions). **d**) Psychophysical thresholds on high available reward trials were significantly smaller than in small available reward trials (A:  $n = 213$ ,  $p < 10^{-22}$ , B:  $n = 84$ ,  $p < 0.01$ ). **e**) Average pupil size during the 250ms prior to the stimulus offset were significantly larger in large compared to small available reward trials in trials (A:  $n = 213$ ,  $p < 10^{-31}$ , B:  $n = 84$ ,  $p < 10^{-19}$ , all paired t-tests).

220  
 221  
 222



223 Remarkably, plotting this modulation across training sessions revealed that this late modulation  
224 only emerged once the animals knew the task well (Fig. 4a) and was correlated with task  
225 performance (Fig. 4b). This late modulation appears to reflect the animals' expectation to  
226 receive a reward based on their knowledge of the probability of being correct given the stimulus  
227 difficulty. It might thus be interpretable as a modulation based on the animal's confidence to  
228 make the correct decision. We will show next that this modulation indeed exhibits established  
229 key signatures<sup>11,29</sup> of decision confidence, supporting this interpretation.  
230

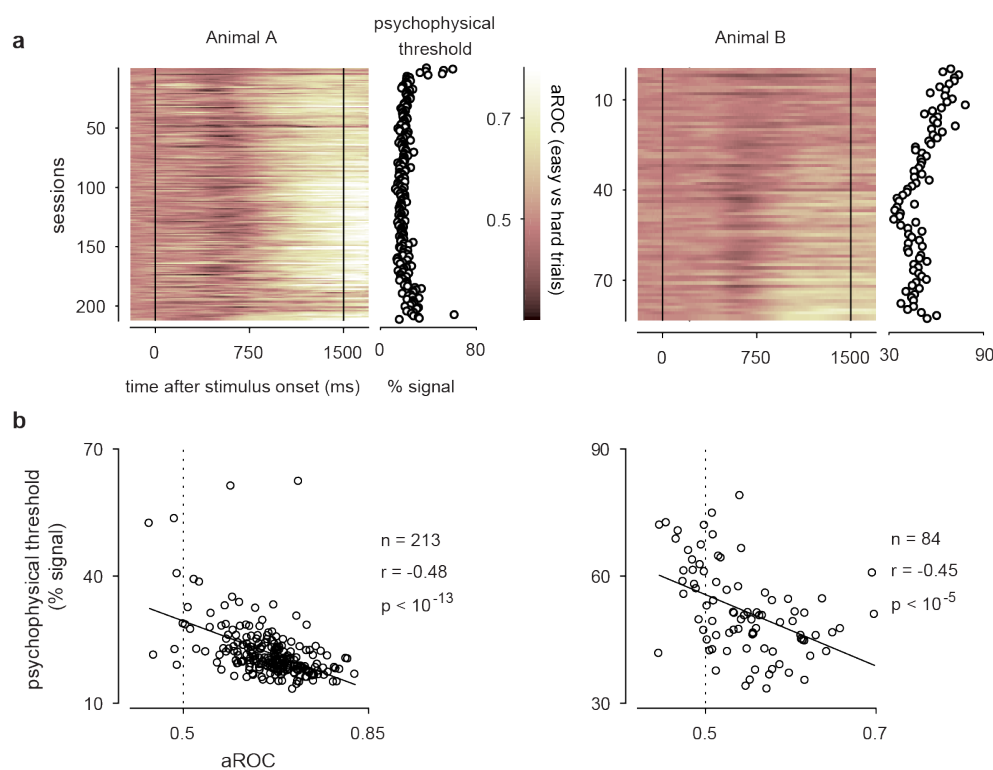

231  
232 **Figure 4. The signature of decision-confidence requires good task performance.** a) Discriminability  
233 between hard (<10%, excluding the 0% signal) and easy ( $\geq 50\%$  signal) trials, quantified as aROC for  
234 each session (ordinate; 213 sessions from animal A, 84 sessions from animal B), plotted as a function of  
235 time (abscissa) in the trial after stimulus onset. Note that the systematically larger pupil size for easy trials  
236 (bright colors) late in the trial emerge only after extensive training, particularly in monkey B. b) The  
237 average aROC during the 250ms prior to the stimulus offset is significantly correlated with the  
238 psychophysical threshold (A: n = 213, r = -0.48, p < 10<sup>-13</sup>, B: n = 84, r = -0.45, p < 10<sup>-5</sup>; Pearson's  
239 correlation coefficient).

240  
241  
242  
243  
244

245 *Pupil size in this task can be used to infer the animal's decision confidence*

246 For a two-alternative sensory discrimination task analogous to the one used here decision  
247 confidence is monotonically related to the distance to a category boundary<sup>11,30</sup>, i.e. the  
248 integrated sensory evidence, as schematically shown in Fig. **5a**. From a statistical perspective  
249 decision confidence in such discrimination tasks should be systematically associated with  
250 evidence discriminability, accuracy and choice outcome (model predictions in Fig. **5b** top row).  
251 Empirically, we found that mean pupil size during the 250ms before stimulus offset showed the  
252 three characteristics of statistical decision confidence keeping reward size constant (we  
253 restricted these analyses to small available reward trials to eliminate the effect of available  
254 reward size). The findings were qualitatively the same when only analyzing large available  
255 reward trials (supplementary Fig. **1**). First, in both animals, pupil size increased monotonically  
256 with performance accuracy (Fig. **5b**, first column). Second, when separating trials based on  
257 pupil size (median split), the animals showed better discrimination performance for trials on  
258 which pupil size was larger, as expected for improved evidence discrimination with higher  
259 decision confidence<sup>11</sup> (Fig. **5b**, middle column). Third, as predicted, when separating correct  
260 and error trials, decision confidence increased on correct and decreased on error trials.  
261 Interestingly, we also observe a slight increase in pupil size with signal strength for higher signal  
262 strengths in animal B. Such a pattern is expected if decision confidence is informed not only by  
263 the strength of the sensory evidence, as described above, but also by decision time as  
264 observed in human observers<sup>18</sup>.

265  
266 Since we used a white fixation marker our results pupil size measurements might in principle  
267 have been affected by the animals' fixation precision. To control for this potential confound we  
268 therefore performed a number of control sessions in which instead of a white fixation dot we  
269 used a black fixation marker. If our results were mostly driven by differences in luminance  
270 resulting from differences in fixation precision across conditions the modulation with our  
271 experimental co-variates should reverse. However, our results were robust when instead of a  
272 white fixation marker we used a black fixation marker (see supplementary Fig. **2**). Together,  
273 these analyses support our conclusion that mean pupil size at the end of the stimulus  
274 presentation can be used to infer the animals' decision confidence.

275

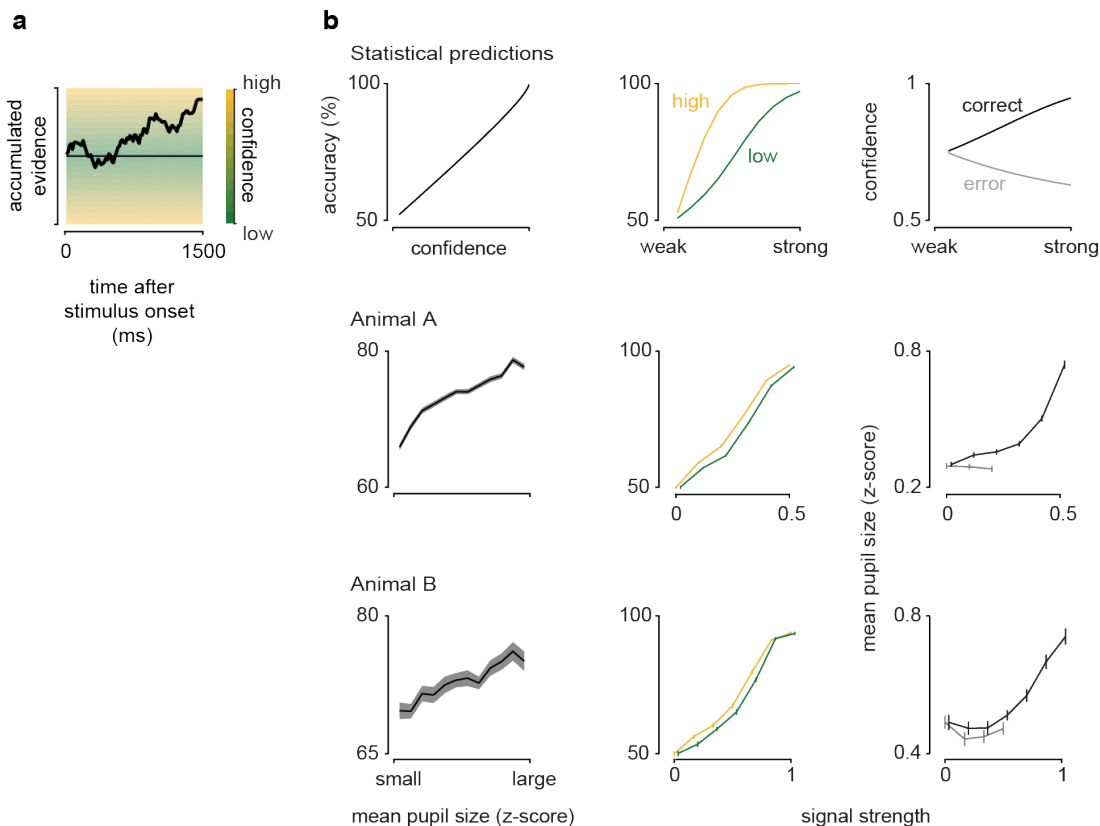

276

277 **Figure 5. Pupil size shows signatures of decision confidence.** **a)** Schematic of a drift-diffusion model  
 278 in which the decision confidence depends on the distance of the decision variable to the category  
 279 boundary. **b)** Signatures of statistical decision confidence (top row) are compared to our metric based on  
 280 pupil size (average pupil size during the 250ms prior to stimulus offset) (middle and bottom rows). Left  
 281 column: Statistical decision confidence predicts accuracy. Similarly, mean pupil size increases  
 282 monotonically with accuracy. Middle column: For high decision confidence statistical decision confidence  
 283 predicts steeper psychometric functions than for low decision confidence. The monkeys' psychometric  
 284 functions separated by mean pupil size are slightly steeper for large compared to small mean pupil size,  
 285 as predicted for decision confidence. Right column: Decision confidence is predicted to increase with  
 286 signal strength in correct trials and decrease with signal strength in error trials. Mean pupil size increases  
 287 for correct and slightly decreases on error trials (monkey A), and for low signal strengths in monkey B.  
 288 Data points are slightly offset for better visualization. For animal A all the sessions were included (213  
 289 sessions). For animal B analyses are restricted to the last 40 sessions with good performance (cf. Fig. 4).  
 290 Data are shown as mean  $\pm$  SEM.

291

292 *The animals' data separated by inferred decision confidence supports the predictions of the*  
 293 *integration-to-bound model*

294 Having established the relationship between pupil-size and decision confidence in our task, we  
 295 now use it to test the confidence-related predictions of the integration-to-bound model using our  
 296 data. To do so, we computed the animals' psychophysical kernels separately after categorizing  
 297 high or low inferred decision confidence trials (median split based on the pupil-size metric). For  
 298 inferred high-confidence trials, we observed a decrease in psychophysical kernel amplitude

299 (PKA) for both monkeys. In contrast, for inferred low confidence trials the PKA either stayed  
 300 relatively constant throughout the trial (monkey B, Fig. 6c), or first increased and then  
 301 decreased (monkey A, Fig. 6b). Furthermore, the PKA at the end of low-confidence trials was  
 302 approximately equal (monkey B) or higher (monkey A) than the PKA for high-confidence trials.  
 303 Importantly, the data for both monkeys best agree with the predictions of an integration-to-  
 304 bound model when subjective confidence is based on both evidence and time<sup>18</sup> with the  
 305 difference between the two animals naturally explainable by differing internal integration bounds  
 306 (cf Fig. 1i and 1j).

307  
 308 We next wondered whether the data was also explainable by two alternative accounts of the  
 309 early psychophysical weighting: first, models with attractor dynamics resulting from recurrent  
 310 feedback, or second a purely feed-forward account that includes adaptation.

311

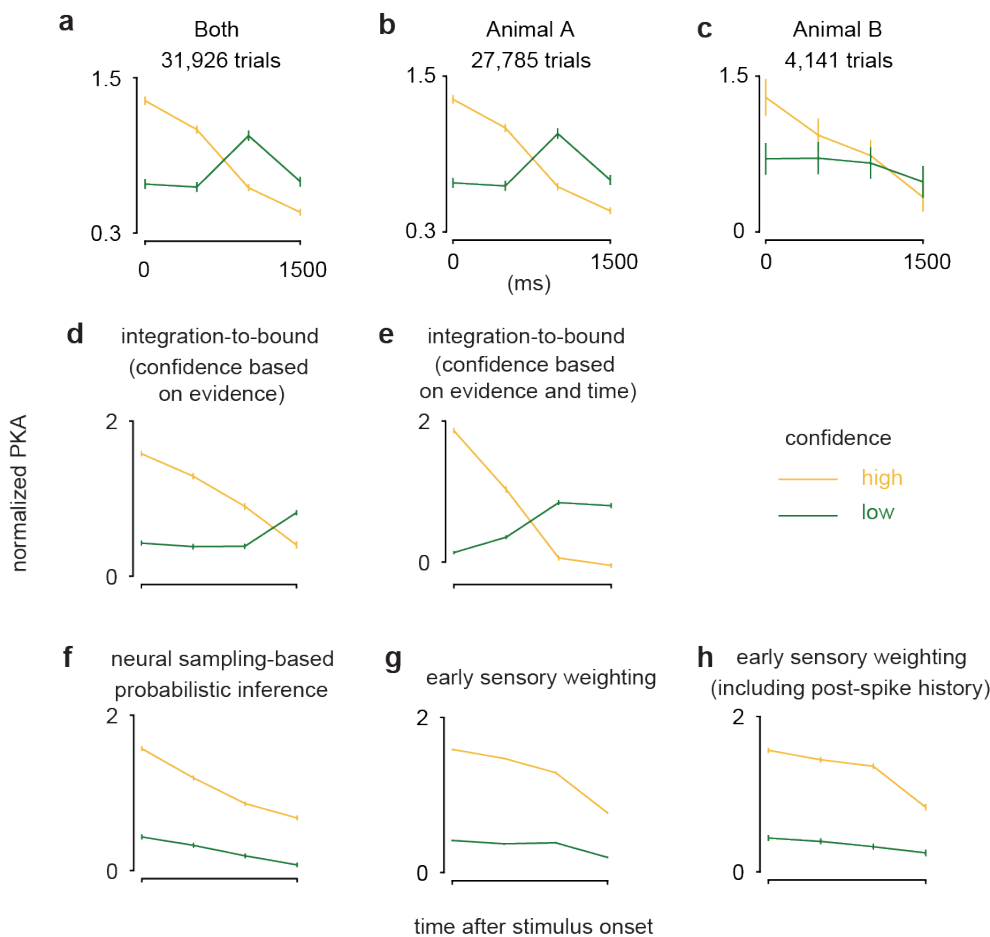

312

313 **Figure 6. The animals' psychophysical weighting on low and high confidence trials is compared to**  
 314 **model predictions.** Psychophysical kernel amplitudes for high (yellow) and low (green) confidence trials  
 315 (median split) are plotted as a function of time. **a**) Psychophysical kernel separated by confidence inferred

316 from pupil size. Data from 0% signal trials were collapsed across animals **a**) and shown separately for  
317 each animal (**b**, **c**) (A: 213 sessions, B: 40 sessions. To avoid confounding the pupil size modulation for  
318 available reward size with that for inferred decision-confidence, the median split based on pupil size to  
319 assign trials to the high or low confidence bin was performed separately for small and high available  
320 reward trials.) Note the similarity of this result to the prediction by an integration-to-bound model (Fig. **6d**,  
321 **e**). **d**) Integration-to-bound model in which trials were separated based on decision confidence defined as  
322 |decision variable|. **e**) Integration-to-bound model in which decision confidence depended on both |decision  
323 variable| and the model's decision time on each trial (see Methods). **f**) Neural sampling-based  
324 probabilistic inference model for which decision-confidence is defined by the Bayesian posterior  
325 probability. **g**) Early sensory weighting model after <sup>4</sup> based on a linear-nonlinear model reflecting the  
326 response dynamics (gain control) of sensory neurons. **h**) An extension of the model used in **g**) to also  
327 include a post-spike filter to capture a neuron's spiking history<sup>4</sup>. Error bars (SEM) were derived by  
328 resampling.

329

330 To test the first alternative account, we implemented a model <sup>17</sup> in which the decrease of the  
331 amplitude of the psychophysical kernel results from self-reinforcing feedback from decision  
332 neurons to sensory neurons. Because of its recurrent connectivity this model exhibits attractor  
333 dynamics, in which early evidence is effectively weighted more strongly than evidence  
334 presented late in the trial. Other recurrent models of perceptual-decision making, whether  
335 across cortical hierarchies <sup>16</sup>, or proposing attractor dynamics within the decision area itself <sup>31,32</sup>  
336 share this attractor behavior. In these models the behavior of decision variable after stimulus  
337 onset can be described by a double-well energy landscape, where the minimum of each well  
338 corresponds to a choice attractor (cf. <sup>16</sup>; inset in their Fig. **2d**). As a result, the effect of early  
339 evidence on the decision variable will be amplified by the subsequent pull exerted by whatever  
340 attractor towards which the early evidence had pushed the decision variable. While this  
341 behavior resembles that of the integration-to-bound model, it differs in its predictions when  
342 separating trials according to confidence (Fig. **6f**). Specifically, we were unable to identify model  
343 parameters for which the kernel amplitude in low confidence trials exceeded that for high  
344 confidence trials at the end of the stimulus presentation (supplementary Fig. **4a**). In order to  
345 convince ourselves that an attractor dynamic by itself is indeed unable to account for our data,  
346 we confirmed this finding for two idealized attractor models in which attractor strength and  
347 hence slope of the PKA were determined by a single parameter (similar to the integration-to-  
348 bound model) – see Supplementary Fig. **4b-c**. As for the neural sampling-based probabilistic  
349 inference model, varying this parameter did not yield kernels for which the kernel amplitude in  
350 low confidence trials exceeded that for high confidence trials at the end of the stimulus  
351 presentation. Indeed, the only way to achieve a similar late-trial PKA for high and low  
352 confidence was to strengthen the attractor dynamics in one of the models to a degree that made

353 the late-trial PKA close to zero – in contradiction to the data (see supplementary Fig. **4b** for  
354 details).

355  
356 Finally, we tested the behavior of two versions of an early sensory weighting model after <sup>4</sup> (their  
357 Fig. **4a** and **6a**), in which the decrease in PKA results from adaptation of the sensory responses  
358 in a purely feed-forward way. The model generates choices based on the integrated inputs of  
359 stimulus-selective sensory neurons, whose response decreases over the time of the stimulus  
360 presentation. Such decrease in response amplitude after response onset is typically observed  
361 for sensory neurons and may reflect a gain control mechanism or stimulus-dependent  
362 adaptation. As expected, we found a decreasing PKA across all trials. But like for the attractor-  
363 based models investigated above, and unlike for our data, the amplitude of the high-confidence  
364 PKA was consistently larger than the low-confidence PKA (Fig. **6g**). This pattern remained  
365 unchanged over a wide range of model parameters that yielded plausible sensory responses  
366 (compare supplementary Fig. **4d**). We also extended this model to include a post-spike filter <sup>4</sup> to  
367 account for a neuron's refractory period and autocorrelation of the spiking response (Fig. **6h**).  
368 Similar to the model without the post-spike filter, the amplitude of the psychophysical kernel for  
369 high confidence trials was consistently higher than that for low confidence trials, differing from  
370 the animals' behavioral data.

371  
372 Together, these results indicate that while each of these models could account for early  
373 psychophysical weighting, a decision bound was necessary to account for the monkeys'  
374 behavioral differences with inferred decision-confidence.

375  
376 **Discussion**

377 The frequently observed <sup>1-4</sup> early weighting of sensory evidence in perceptual decision-making  
378 tasks has classically been explained to reflect an integration-to-bound decision process <sup>1,33</sup>.  
379 Here, we first derived decision confidence-specific predictions for this account. Second, in order  
380 to test these predictions, we devised a metric based on pupil size that allowed us to estimate  
381 two macaques' subjective decision confidence on individual trials without the use of a wagering  
382 paradigm. Finally, we compared our confidence-specific data to two alternative accounts of  
383 early weighting – attractor dynamics and response adaptation – and found that neither of those  
384 models could explain our data. This combined approach provided new insights into the animals'  
385 decision-formation process. It revealed that the frequently observed <sup>1-4</sup> early weighting of the  
386 sensory evidence was largely restricted to high-confidence trials, and that the shape of the

387 psychophysical kernel amplitude (PKA) confirmed our predictions based on the integration-to-  
388 bound model. In fact, the match between data and model was best when we incorporated a  
389 recent proposal about how subjective confidence was not just based on the strength of the  
390 presented evidence, but also integration time<sup>18</sup>. Moreover, our data could not be fully explained  
391 by other computational accounts for early psychophysical weighting such as sensory adaptation  
392<sup>4</sup> or models of perceptual decision-making with recurrent processing<sup>16,17,32</sup>. We note that our  
393 findings do not preclude the contribution of these alternative models. However, our results  
394 highlight that none of these accounts is sufficient to explain the data by itself and that a  
395 decision-rule that implements an early stopping of the evidence integration process appears  
396 necessary.

397  
398 Our analysis of pupil size showed that even without the stabilizing effect of long inter-trial  
399 intervals pupil size was reliably correlated with experimental covariates, and could be used to  
400 infer the animal's decision confidence. The correlation of pupil size with decision confidence is  
401 similar to that in a recent psychophysical study in humans<sup>34</sup> that queried decision confidence  
402 directly. As we did here, this study found a positive correlation between subjects' pupil size  
403 before they made their judgment and their reported decision confidence. Previous work inferring  
404 an animal's decision confidence typically relied on behavioral measurements such as post-  
405 decision wagering<sup>12,13</sup> and the time an animal is willing to wait for a reward<sup>35</sup>, which increases  
406 the complexity of the behavioral paradigm and hence the required training of the animals. To  
407 our knowledge the present study is the first to relate pupil size measurements in animals to  
408 decision-confidence. Such a pupil-size based metric opens up studies of decision making in  
409 animals to include decision confidence without increasing the complexity of the behavioral  
410 paradigm.

411  
412 In our task the animals were rewarded on each trial directly after making their choice.  
413 Consistent with modulation of pupil-linked arousal due to reward expectation<sup>25,36</sup>, pupil size was  
414 progressively larger towards the end of the trial when the (known) available reward was large  
415 compared to when it was small (cf. Fig. **3b**). Such reward-based interpretation of the pupil-size  
416 modulation associated with decision-confidence may explain our and<sup>34</sup> findings here, which  
417 contrasts with studies associating increases in pupil size with uncertainty e.g.<sup>29,37-40</sup>.  
418 Specifically, a recent study<sup>29</sup> observed the opposite relationship between inferred decision  
419 confidence and pupil size, measured after the subject's perceptual report: larger pupil size after  
420 the subject's report, and before receiving feedback, was associated with higher decision

421 uncertainty. Access to information, e.g. whether or not a choice is correct, can be rewarding by  
422 itself<sup>41,42</sup>. It may therefore be that in<sup>29</sup> the reward was such access to information, i.e. the  
423 feedback on each trial. When the confidence about the correct choice is low, the information is  
424 more valuable, hence resulting in the observed negative correlation with pupil size. Alternatively,  
425 this discrepancy may also reflect methodological differences such as the time-interval used for  
426 the analysis (before or after the choice was made, but see also<sup>38</sup>). More generally, these  
427 findings underscore the importance to consider a subject's motivational context when  
428 interpreting pupil size modulation.

429  
430 Moreover, pupil-size modulation by cognitive factors has been linked to a number of neural  
431 circuits mirroring the complexity of the signal. These include the locus coeruleus noradrenergic  
432 system<sup>43,44</sup>, a brain-wide neuromodulatory system involved in arousal, the inferior and superior  
433 colliculi, which mediate a subject's orienting response to salient stimuli<sup>45,46</sup>, but there is also  
434 evidence for an association with cholinergic modulation<sup>47,48</sup>, which is also linked to attention.

435  
436 The emergence of a reliable signature of decision-confidence required that the animals  
437 performed the task well (cf. Fig. 4). We propose two possible, not mutually exclusive, accounts  
438 for this. First, in line with the notion that the observed pupil-size modulation linked to decision  
439 confidence is driven in part by reward expectation, it may reflect the animal's improved  
440 knowledge of the timing of the task and hence the anticipation of the reward. Second, it may  
441 reflect the fact that in order to engage the pupil-linked arousal circuitry a certain threshold of  
442 decision-confidence needs to be exceeded. Such an interpretation would mean that once the  
443 signature of decision-confidence emerges a higher level of decision-confidence is reached at  
444 least on some trials.

445  
446 Our animals' psychophysical behavior separated by inferred decision-confidence was well  
447 described by a bounded accumulation decision process. These results imply that in a subset of  
448 trials sensory evidence was ignored after a certain level of decision-confidence had been gained.  
449 We find that in our task, across all difficulty levels, the loss in performance is small for the  
450 bounds required to explain our data (suppl. Fig. 5). Since the overall loss will differ between  
451 different experiments, it might explain some of the differences seen in the temporal profile of  
452 PKAs across studies (e.g.<sup>1-5,7,49</sup>). Furthermore, under the assumption that evidence  
453 accumulation is costly, it may provide a normative reason for the early termination of evidence  
454 integration<sup>50,51</sup>.



455

456

## 457 **Materials & Methods**

458 *Animal preparation and surgery.* All experimental protocols were approved by the local  
459 authorities (Regierungspräsidium Tübingen). Two adult male rhesus monkeys (*Macaca*  
460 *mulatta*); A (7 kg; 11 years old) and animal B (8 kg; 11 years old), housed in pairs, participated  
461 in the experiments. The animals were surgically implanted with a titanium head post under  
462 general anesthesia using aseptic techniques as described previously<sup>52</sup>.

463 *Visual discrimination task.* The animals were trained to perform a two choice disparity  
464 discrimination task (Fig.2a). The animals initiated trials with the visual fixation on a small white  
465 fixation spot (size: 0.08-0.12°) located on the center of the screen. After the animals maintained  
466 fixation for 500ms, a visual stimulus was presented (median eccentricity for Animal A: 5.3°;  
467 range 3.0 – 9.0°, median eccentricity for Animal B: 3.0°, range 2.3 – 5.0°) for 1,500ms. After that  
468 two choice targets, each consisting of a symbol representing either a near or a far choice and  
469 whose positions were randomized between trials, appeared above and below the fixation spot.  
470 Once the fixation spot disappeared, the animals were allowed to make a choice via saccade to  
471 one of these targets. The animals received a liquid reward for correct choices. Randomizing  
472 target positions allowed us to disentangle saccade direction and choice.

473 *Visual stimuli.* Visual stimuli (luminance linearized) were back-projected on a screen using a  
474 DLP LED Propixx projector (ViewPixx; run at 100Hz; 1920 x 1080 pixel resolution, 30 cd/m<sup>2</sup>  
475 mean luminance) and an active circular polarizer (Depth Q; 200Hz) for animal B (viewing  
476 distance 97.5cm), or two projection design projectors (F21 DLP; 60Hz; 1920 x 1080 pixel  
477 resolution, 225 cd/m<sup>2</sup> mean luminance, and a viewing distance of 149 cm) and passive linear  
478 polarizing filters for animal A. The animals viewed the screen through passive circular (animal  
479 A) or linear (animal B), respectively, polarizing filter. Stimuli were generated with custom written  
480 software using Matlab (Mathworks, USA) and the psychophysics toolbox<sup>53–55</sup>.

481 The stimuli were circular dynamic random dot stereograms (RDS), which consisted of equal  
482 numbers of white and black dots, similar to those previously used<sup>3</sup>. Each RDS had a disparity-  
483 varying circular center (3° diameter) surrounded by an annulus (1° wide) shown at 0° disparity.  
484 On each video-frame, all center dots had the same disparity whose value was changed  
485 randomly on each video-frame according to the probability mass distribution set for the stimulus.  
486 For the 0% signal stimulus the disparity drawn from a uniform distribution (typically 11 values in  
487 0.05° increments from -0.25° to 0.25°). The monkeys were rewarded randomly on half of the  
488 trials on 0% signal trials. These 0% signal trials were randomly interleaved with near disparity or

489 far disparity signal trials. For each session, one near and one far disparity value was used to  
490 introduce disparity signal by increasing the probability of this disparity on each video frame  
491 during the stimulus presentation on this trial. The range of signal strengths was adjusted  
492 between sessions to manipulate task difficulty and encourage performance at psychophysical  
493 threshold. Typical added signal values were 3%, 6%, 12%, 25% and 50%.

494 The choice target symbols were random dot stereograms very similar to 100% signal stimuli  
495 except that their diameter was smaller ( $2.2^\circ$ ).

496 To allow for constant mean luminance across the screen, equal numbers of black and white  
497 dots were used for the stimulus and the target symbols. Since we used a white fixation dot  
498 systematic differences in fixation precision could- in principle- influence our findings. If this were  
499 the case a black fixation marker should give the opposite results. We therefore also conducted  
500 control experiments using a black fixation marker, which yielded very similar results, indicating  
501 that systematic differences in fixation precision are insufficient to explain our findings.

502 *Reward size.* To discourage the animals from guessing the available reward size was increased  
503 based on their task performance. After 3 consecutive trials with correct choices, the available  
504 reward size was doubled compared to the original reward size. After 4 consecutive trials with  
505 correct choices, the available reward size was again doubled (quadruple compared to the  
506 original size) and remained at this size until the next error. After every error trial, the available  
507 reward size was reset to the original.

508 *Pupil data acquisition and analysis.* During the experiments, the animals' eye positions and pupil  
509 size were measured at 500Hz using an infrared video-based eye tracker (Eyelink 1000, SR  
510 Research Ltd, Canada), digitized and stored for the subsequent offline analysis. The eye tracker  
511 was mounted in a fixed position on the primate chair to minimize variability in pupil size  
512 measurements between sessions. Our pupil analysis focused on the period of animals' fixation  
513 in which the gaze angles were constant.

514 Only successfully completed trials (correct and error trials) were included for the analysis.  
515 During pre-processing we first down-sampled the pupil size data such that the sampling rate  
516 matched the refresh rates of our screens (60Hz for animal A, 100Hz for animal B), effectively  
517 low-pass filtering the data. We next high-pass filtered the data by subtracting on each trial the  
518 mean pupil size of the preceding 10 and following 10 trials (excluding the value of the current  
519 trial). This analysis removed linear trends on the pupil size within a session and was omitted for  
520 the analysis of pupil size changes throughout a session (Fig. **3a**). Finally, pupil size  
521 measurements were z-scored using the mean and standard deviation during the stimulus  
522 presentation period across all trials.

523 When comparing pupil size across conditions we aimed to minimize any mean difference of  
524 pupil size between conditions at stimulus onset. To do so, we computed a baseline pupil size,  
525 which was defined as the average pupil size in the epoch 200ms prior to stimulus onset, and  
526 iteratively excluded trials in which the baseline value deviated most from the condition with the  
527 higher number of trials until the absolute mean difference of the z-score of the baseline pupil  
528 size was below 0.05. This procedure successfully made the baseline pupil size statistically  
529 indistinguishable across conditions with a small loss of trials in each session (mean  $\pm$  SD of the  
530 lost trials; Animal A,  $6.89 \pm 3.90\%$ ; Animal B,  $8.24 \pm 3.20\%$ ).

531 *Psychometric threshold.* The animals' choice-behaviors were summarized as a psychometric  
532 function by plotting the percentage of 'far' choices as a function of the signed disparity signals  
533 and then fitted with a cumulative Gaussian function using maximum likelihood estimation. The  
534 standard deviation of the cumulative Gaussian fit was defined as the psychophysical threshold  
535 and corresponds to the 84% correct level. The mean of the cumulative Gaussian quantified the  
536 subject's bias.

537 *Psychophysical kernel.* Psychophysical kernels were computed to quantify how the animals  
538 used the stimulus for their choices<sup>3,15</sup>. Only 0% signal trials were used for this analysis. First,  
539 the stimulus was converted into an n-by-m matrix (n: number of discrete disparity values used  
540 for the stimulus; m: number of trials) that contained the number of video frames on which each  
541 disparity was presented per trial. Next, the trials were divided into 'far' choice and 'near' choice  
542 trials. The time-averaged psychophysical kernel was then computed as the difference between  
543 the mean matrix for 'near' choice trials and that for 'far' choice trials. We also computed a time-  
544 resolved psychophysical kernel as the psychophysical kernels for four non-overlapping  
545 consecutive time bins (each of 375ms duration) during the stimulus presentation period. Kernels  
546 were averaged across sessions, weighted by the number of trials in that session. The amplitude  
547 of the psychophysical kernels over time was calculated as the inner product between the time-  
548 averaged psychophysical kernel and the psychophysical kernel for each time bin. Kernel  
549 amplitudes separated by inferred decision confidence were then normalized by the maximum of  
550 the psychophysical kernel averaged across both conditions such that the relative differences  
551 between conditions remained. The standard error of the amplitude was calculated by  
552 bootstrapping (1000 repeats).

553 *Operationalizing decision-confidence:* When viewed from a statistical perspective decision  
554 confidence can be linked to several behavioral metrics such as accuracy, discriminability and  
555 choices on error or correct trials<sup>11</sup> (Fig. **5b**). Here, we simulated an observer's decision-  
556 variables on each trial analogously to<sup>29</sup>. The decision variable ( $d$ ) was drawn from a normal

557 distribution whose mean depended on the signed signal strength (with negative and positive  
558 signal reflecting near and far stimuli, respectively) and the standard deviation on the observer's  
559 internal noise (22.8 % signal, the median of the animals' psychophysical thresholds). The sign  
560 of the  $d$  determined the choice on each trial. Assuming a category boundary  $c$ , trial-by-trial  
561 confidence (the distance between the decision variable and the category boundary) was  
562 transformed into a percent correct <sup>35</sup>:

$$563 \quad \text{confidence} = \frac{1}{n} \sum_{i=1}^n f(|d_i - c|)$$

564 where  $f$  is the cumulative density function of the normal distribution.

$$565 \quad f(x) = \frac{1}{2} \left[ 1 + \operatorname{erf} \left( \frac{x}{\sigma\sqrt{2}} \right) \right] \times 100\%$$

566 To simulate the relationship between accuracy and confidence, we generated the  $d$  for  $10^8$  trials,  
567 binned these based on the level of confidence (20 bins) and computed the accuracy for each  
568 bin. To examine the relationship between confidence and psychophysical performance  
569 performed a median split of the trials based on confidence and measured the psychometric  
570 function for high and low confidence trials. Finally, we calculated the mean confidence as a  
571 function of signal strength separately for correct and error trials.

572

573 *Perceptual decision models:* To compare the animals' psychophysical kernels to different  
574 decision-strategies we simulated different perceptual decision models and calculated  
575 psychophysical kernels for the model data. For all simulations only 0% signal trials were used,  
576 and the model "decision-confidence" was defined as |decision-variable| at the end of each trial,  
577 unless stated otherwise. Psychophysical kernel amplitudes were then computed separately for  
578 high and low confidence trials, after a median split based on this metric for decision-confidence.

579 *Integration-to-bound model:* In this model the decision-variable ( $d$ ) is computed as the  
580 integrated time-varying difference of the population response of two pools of sensory neurons.  
581 (For the disparity discrimination task these would consist of one pool preferring near disparities,  
582 the other preferring far disparities.) We computed the time-varying population response as the  
583 dot product between the time-varying stimulus (analogous to that used in the experiments) and  
584 an idealized version of the animals' time-averaged psychophysical kernel. On each trial, once  
585 the decision variable reached a decision bound (at decision time,  $t$ ) <sup>1,33</sup> the decision-variable  
586 was fixed at that value (absorbing bound) until the end of the trial. The choice of the model was  
587 based on  $\operatorname{sign}(d)$  at the end of the trial. We used two approaches to derive decision confidence  
588 for this model. First, it was defined as  $|d|$  at the end of the trial. This approach ignores the  
589 decision time. This model had one free parameter (the height of the decision bound), which we

590 varied to best account for the time-courses of the psychophysical kernel amplitudes for low and  
591 high confidence trials. In this model, all trials in which the decision bound was reached are  
592 assigned the same confidence. Second, we also generated predictions for the proposal that  
593 subjective confidence is higher for those trials in which the bound is reached earlier<sup>12,18</sup>. Since  
594 our analysis only relied on the rank-order of the trials based on confidence our results are  
595 independent of how exactly this time is converted into confidence.

596 *Neural sampling-based probabilistic inference model (Haefner et al 2016)*: We used the model  
597 by<sup>17</sup>, implemented for an orientation discrimination task. In this model, the decision is based on  
598 a belief over the correct decision (posterior-probability over the correct decision), which is  
599 updated throughout each trial. The decision-confidence was computed as  $|\text{posterior-probability}-$   
600  $0.5|$ , which effectively reflects the distance of the posterior to the category boundary. To  
601 approximate the time-course of the psychophysical kernel amplitude for high and low  
602 confidence trials we varied the strength of the feedback in the model, the contrast of the  
603 orientation-selective component of the stimulus and the trial duration. The parameters used to  
604 generate the sampling model predictions were largely the same as in the original paper ( $\kappa = 2$ ,  $\lambda$   
605  $= 3$ ,  $\delta = 0.08$ ,  $n_s = 20$ , stimulus contrast on each individual frame = 10, see<sup>17</sup>) and only differed in  
606 the number of sensory neurons ( $n_x = 256$ ,  $n_g = 64$ ) to reduce computation time. The decreasing  
607 PKA in this model is the result of a feedback loop between the decision-making area and the  
608 sensory representation.

609 *Evidence-accumulation toy-model*: To be able to systematically explore the predictions of  
610 attractor-based models for confidence-specific PKAs, we devised two simple abstract models. In  
611 the first the decision variable  $d_t$  at time  $t$  is defined as:

$$612 \quad d_t = d_{t-1}(1 + \alpha) + \mu_t,$$

613 where  $\mu_t$  is the sensory evidence at time  $t$ , and  $\alpha$  is an acceleration parameter of accumulation  
614 process (cf.<sup>5</sup>): For  $\alpha = 0$  the model performs perfect integration. For  $\alpha < 0$  it is a leaky integrator,  
615 and for  $\alpha > 0$  the model implements a confirmation bias or attractor. In the second model, a  
616 variant of the previous one, the acceleration parameter  $\alpha$  depends on a sigmoidal function of  $d$   
617 such that instead:

$$618 \quad d_t = d_{t-1}(1 + \alpha \tanh(d_{t-1})) + \mu_t.$$

619 For  $\alpha > 0$  the behavior of the  $d_t$  can then be described by an attractor with a double-well energy  
620 landscape in which the minimum of each well correspond to the choice attractors (cf.<sup>16</sup>), a  
621 behavior also observed for the sampling model by<sup>17</sup>.

622  
623 *Early sensory weighting model after Yates et al. (2017)*<sup>4</sup>: We simulated psychophysical model  
624 decisions based on sensory responses of a linear-nonlinear (LN) model. The linear stage  
625 consisted of two temporal filters ( $k$ , one for contrast, one for disparity):

$$626 \quad k(t) = e^{-t/\tau}(1 - e^{-t/\tau}) + at + b, \text{ where } 0 < t < t_{max}, a \geq 0, b \leq 0, \tau > 0.$$

627 The time-varying disparity stimulus and the stimulus contrast were each convolved with the  
628 temporal filter, and their sum ( $x(t)$ ) was exponentiated to generate spike rates:

$$629 \quad \lambda(t) = e^{x(t)}$$

630 The model parameters  $a$ ,  $b$ ,  $t_{max}$ ,  $\tau$  as well as the relative weights of the disparity and contrast  
631 kernels were chosen such that the dynamics of the output of the LN model approximately  
632 matched that of the average peri-stimulus-time histograms (PSTHs) neurons in area MT (Yates  
633 et al.; their Fig. 3b). (Starting from these initial values we then varied these model parameters to  
634 explore a range of adaptation levels as shown in supplementary Fig. 4.) To simulate the  
635 decision process we used two of these MT responses but with opposite tuning, and computed  
636 the decision variable ( $d(t)$ ) as the integral of the difference of these time-varying MT responses.  
637 The decision on each trial was based on  $\text{sign}(d(t))$  at the end of the trial, and decision  
638 confidence defined as  $|d|$  at the end of the trial.

639 To additionally account for the temporal autocorrelation of the spiking response we also  
640 simulated a variant of this basic model, also after<sup>4</sup>. This variant was identical to the first except  
641 that, first, we generated spikes based on the spike rates using a Poisson process. Second, we  
642 included spike history term such that:

$$643 \quad \lambda(t) = e^{(x(t) + h * r(t-1))},$$

644 where  $h$  ("history filter" as in<sup>4</sup>, their suppl. Fig. 1c) are the post-spike weights that integrate the  
645 neuron's own spiking history ( $r(t-1)$ ).

646 *Inclusion Criteria.* Trials with fixation errors were excluded, and we only included sessions in  
647 which the animals completed at least 600 trials, and in which each experimental condition had  
648 at least 10 trials. For each session, three psychometric functions were computed (one using all  
649 the completed trials, one each including only trials for which the large available reward size was  
650 large or small, respectively). We fitted cumulative Gaussians to each of these psychometric  
651 functions, and only sessions for which each of these fits explained > 90% of the variance were  
652 included.

653

- 654 1. Kiani, R., Hanks, T. D. & Shadlen, M. N. Bounded integration in parietal cortex underlies decisions  
655 even when viewing duration is dictated by the environment. *J Neurosci* **28**, 3017-3029 (2008).
- 656 2. Neri, P. & Levi, D. Temporal dynamics of directional selectivity in human vision. *J Vis* **8**, 22 1-2211  
657 (2008).
- 658 3. Nienborg, H. & Cumming, B. G. Decision-related activity in sensory neurons reflects more than a  
659 neuron's causal effect. *Nature* **459**, 89-92 (2009).
- 660 4. Yates, J. L., Park, I. M., Katz, L. N., Pillow, J. W. & Huk, A. C. Functional dissection of signal and  
661 noise in MT and LIP during decision-making. *Nat Neurosci* **20**, 1285-1292 (2017).
- 662 5. Brunton, B. W., Botvinick, M. M. & Brody, C. D. Rats and humans can optimally accumulate  
663 evidence for decision-making. *Science* **340**, 95-98 (2013).
- 664 6. Raposo, D., Kaufman, M. T. & Churchland, A. K. A category-free neural population supports  
665 evolving demands during decision-making. *Nat Neurosci* **17**, 1784-1792 (2014).
- 666 7. Drugowitsch, J., Wyart, V., Devauchelle, A. D. & Koechlin, E. Computational Precision of Mental  
667 Inference as Critical Source of Human Choice Suboptimality. *Neuron* **92**, 1398-1411 (2016).
- 668 8. Pitkow, X., Liu, S., Angelaki, D. E., DeAngelis, G. C. & Pouget, A. How Can Single Sensory  
669 Neurons Predict Behavior? *Neuron* **87**, 411-423 (2015).
- 670 9. Clery, S., Cumming, B. G. & Nienborg, H. Decision-related activity in macaque V2 for fine disparity  
671 discrimination is not compatible with optimal linear read-out. *J Neurosci* (2017).
- 672 10. Cumming, B. G. & Nienborg, H. Feedforward and feedback sources of choice probability in neural  
673 population responses. *Curr Opin Neurobiol* **37**, 126-132 (2016).
- 674 11. Hangya, B., Sanders, J. I. & Kepecs, A. A Mathematical Framework for Statistical Decision  
675 Confidence. *Neural Comput* **28**, 1840-1858 (2016).
- 676 12. Kiani, R. & Shadlen, M. N. Representation of confidence associated with a decision by neurons in  
677 the parietal cortex. *Science* **324**, 759-764 (2009).
- 678 13. Komura, Y., Nikkuni, A., Hirashima, N., Uetake, T. & Miyamoto, A. Responses of pulvinar neurons  
679 reflect a subject's confidence in visual categorization. *Nat Neurosci* **16**, 749-755 (2013).
- 680 14. Neri, P., Parker, A. J. & Blakemore, C. Probing the human stereoscopic system with reverse  
681 correlation. *Nature* **401**, 695-698 (1999).
- 682 15. Nienborg, H. & Cumming, B. G. Psychophysically measured task strategy for disparity  
683 discrimination is reflected in V2 neurons. *Nat Neurosci* **10**, 1608-1614 (2007).
- 684 16. Wimmer, K. et al. Sensory integration dynamics in a hierarchical network explains choice  
685 probabilities in cortical area MT. *Nat Commun* **6**, 6177 (2015).
- 686 17. Haefner, R. M., Berkes, P. & Fiser, J. Perceptual Decision-Making as Probabilistic Inference by  
687 Neural Sampling. *Neuron* **90**, 649-660 (2016).
- 688 18. Kiani, R., Corthell, L. & Shadlen, M. N. Choice certainty is informed by both evidence and decision  
689 time. *Neuron* **84**, 1329-1342 (2014).
- 690 19. Bradley, M. M., Miccoli, L., Escrig, M. A. & Lang, P. J. The pupil as a measure of emotional arousal  
691 and autonomic activation. *Psychophysiology* **45**, 602-607 (2008).
- 692 20. Ebitz, R. B. & Platt, M. L. Neuronal activity in primate dorsal anterior cingulate cortex signals task  
693 conflict and predicts adjustments in pupil-linked arousal. *Neuron* **85**, 628-640 (2015).
- 694 21. Mitz, A. R., Chacko, R. V., Putnam, P. T., Rudebeck, P. H. & Murray, E. A. Using pupil size and  
695 heart rate to infer affective states during behavioral neurophysiology and neuropsychology  
696 experiments. *J Neurosci Methods* **279**, 1-12 (2017).
- 697 22. Rudebeck, P. H. et al. A role for primate subgenual cingulate cortex in sustaining autonomic  
698 arousal. *Proc Natl Acad Sci U S A* **111**, 5391-5396 (2014).
- 699 23. Suzuki, T. W., Kunitatsu, J. & Tanaka, M. Correlation between Pupil Size and Subjective Passage  
700 of Time in Non-Human Primates. *J Neurosci* **36**, 11331-11337 (2016).
- 701 24. Cicmil, N., Cumming, B. G., Parker, A. J. & Krug, K. Reward modulates the effect of visual cortical  
702 microstimulation on perceptual decisions. *Elife* **4**, e07832 (2015).
- 703 25. Baruni, J. K., Lau, B. & Salzman, C. D. Reward expectation differentially modulates attentional  
704 behavior and activity in visual area V4. *Nat Neurosci* **18**, 1656-1663 (2015).
- 705 26. Alnæs, D. et al. Pupil size signals mental effort deployed during multiple object tracking and  
706 predicts brain activity in the dorsal attention network and the locus coeruleus. *J Vis* **14**, (2014).
- 707 27. Hess, E. H. & Polt, J. M. Pupil Size in Relation to Mental Activity during Simple Problem-Solving.  
708 *Science* **143**, 1190-1192 (1964).
- 709 28. Kahneman, D. & Beatty, J. Pupil diameter and load on memory. *Science* **154**, 1583-1585 (1966).

- 710 29. Urai, A. E., Braun, A. & Donner, T. H. Pupil-linked arousal is driven by decision uncertainty and  
711 alters serial choice bias. *Nat Commun* **8**, 14637 (2017).
- 712 30. Kepecs, A., Uchida, N., Zariwala, H. A. & Mainen, Z. F. Neural correlates, computation and  
713 behavioural impact of decision confidence. *Nature* **455**, 227-231 (2008).
- 714 31. Wang, X. J. Probabilistic decision making by slow reverberation in cortical circuits. *Neuron* **36**, 955-  
715 968 (2002).
- 716 32. Wong, K. F., Huk, A. C., Shadlen, M. N. & Wang, X. J. Neural circuit dynamics underlying  
717 accumulation of time-varying evidence during perceptual decision making. *Front Comput Neurosci*  
718 **1**, 6 (2007).
- 719 33. Mazurek, M. E., Roitman, J. D., Ditterich, J. & Shadlen, M. N. A role for neural integrators in  
720 perceptual decision making. *Cereb Cortex* **13**, 1257-1269 (2003).
- 721 34. Krishnamurthy, K., Nassar, M. R., Sarode, S. & Gold, J. I. Arousal-related adjustments of  
722 perceptual biases optimize perception in dynamic environments. *Nat Hum Behav* **1**, (2017).
- 723 35. Lak, A. et al. Orbitofrontal cortex is required for optimal waiting based on decision confidence.  
724 *Neuron* **84**, 190-201 (2014).
- 725 36. Varazzani, C., San-Galli, A., Gilardeau, S. & Bouret, S. Noradrenaline and dopamine neurons in the  
726 reward/effort trade-off: a direct electrophysiological comparison in behaving monkeys. *J Neurosci*  
727 **35**, 7866-7877 (2015).
- 728 37. de Berker, A. O. et al. Computations of uncertainty mediate acute stress responses in humans. *Nat*  
729 *Commun* **7**, 10996 (2016).
- 730 38. Lempert, K. M., Chen, Y. L. & Fleming, S. M. Relating Pupil Dilation and Metacognitive Confidence  
731 during Auditory Decision-Making. *PLoS One* **10**, e0126588 (2015).
- 732 39. Nassar, M. R. et al. Rational regulation of learning dynamics by pupil-linked arousal systems. *Nat*  
733 *Neurosci* **15**, 1040-1046 (2012).
- 734 40. Satterthwaite, T. D. et al. Dissociable but inter-related systems of cognitive control and reward  
735 during decision making: evidence from pupillometry and event-related fMRI. *Neuroimage* **37**, 1017-  
736 1031 (2007).
- 737 41. Behrens, T. E., Woolrich, M. W., Walton, M. E. & Rushworth, M. F. Learning the value of  
738 information in an uncertain world. *Nat Neurosci* **10**, 1214-1221 (2007).
- 739 42. Bromberg-Martin, E. S. & Hikosaka, O. Midbrain dopamine neurons signal preference for advance  
740 information about upcoming rewards. *Neuron* **63**, 119-126 (2009).
- 741 43. Aston-Jones, G. & Cohen, J. D. Adaptive gain and the role of the locus coeruleus-norepinephrine  
742 system in optimal performance. *J Comp Neurol* **493**, 99-110 (2005).
- 743 44. Joshi, S., Li, Y., Kalwani, R. M. & Gold, J. I. Relationships between Pupil Diameter and Neuronal  
744 Activity in the Locus Coeruleus, Colliculi, and Cingulate Cortex. *Neuron* **89**, 221-234 (2016).
- 745 45. Wang, C. A., Boehnke, S. E., White, B. J. & Munoz, D. P. Microstimulation of the monkey superior  
746 colliculus induces pupil dilation without evoking saccades. *J Neurosci* **32**, 3629-3636 (2012).
- 747 46. Wang, C. A. & Munoz, D. P. A circuit for pupil orienting responses: implications for cognitive  
748 modulation of pupil size. *Curr Opin Neurobiol* **33**, 134-140 (2015).
- 749 47. Reimer, J. et al. Pupil fluctuations track rapid changes in adrenergic and cholinergic activity in  
750 cortex. *Nat Commun* **7**, 13289 (2016).
- 751 48. Polack, P. O., Friedman, J. & Golshani, P. Cellular mechanisms of brain state-dependent gain  
752 modulation in visual cortex. *Nat Neurosci* **16**, 1331-1339 (2013).
- 753 49. Wyart, V., de Gardelle, V., Scholl, J. & Summerfield, C. Rhythmic fluctuations in evidence  
754 accumulation during decision making in the human brain. *Neuron* **76**, 847-858 (2012).
- 755 50. Deneve, S. Making decisions with unknown sensory reliability. *Front Neurosci* **6**, 75 (2012).
- 756 51. Drugowitsch, J., Moreno-Bote, R. & Pouget, A. Optimal decision-making with time-varying evidence  
757 reliability. *Advances in Neural Information ...* **1**, 748-756 (2014).
- 758 52. Seillier, L. et al. Serotonin decreases the gain of visual responses in awake macaque V1. *J*  
759 *Neurosci* (2017).
- 760 53. Brainard, D. H. The Psychophysics Toolbox. *Spat Vis* **10**, 433-436 (1997).
- 761 54. Kleiner, M., Brainard, D. H. & Pelli, D. G. What's new in Psychtoolbox-3? *Perception* **36**, ECVF  
762 Abstract Supplement (2007).
- 763 55. Pelli, D. G. The VideoToolbox software for visual psychophysics: transforming numbers into movies.  
764 *Spat Vis* **10**, 437-442 (1997).
- 765
